# Supplementary material for: Synthesis and Self-Assembly of Shape Amphiphiles Based on POSS-Dendron Conjugates
Source: MDPI journal article supplement (doi:10.3390/molecules22040622), 2017-04-21
Supplement: s1 [file s1]

## Supplementary Materials

# Synthesis and Self-assembly of Shape Amphiphiles Based on POSS-Dendron Conjugates

Yu Shao, Minyuan Ding, Fangjia Zhao, Hui Dai, Xia-Ran Miao, Shuguang Yang, Hui Li

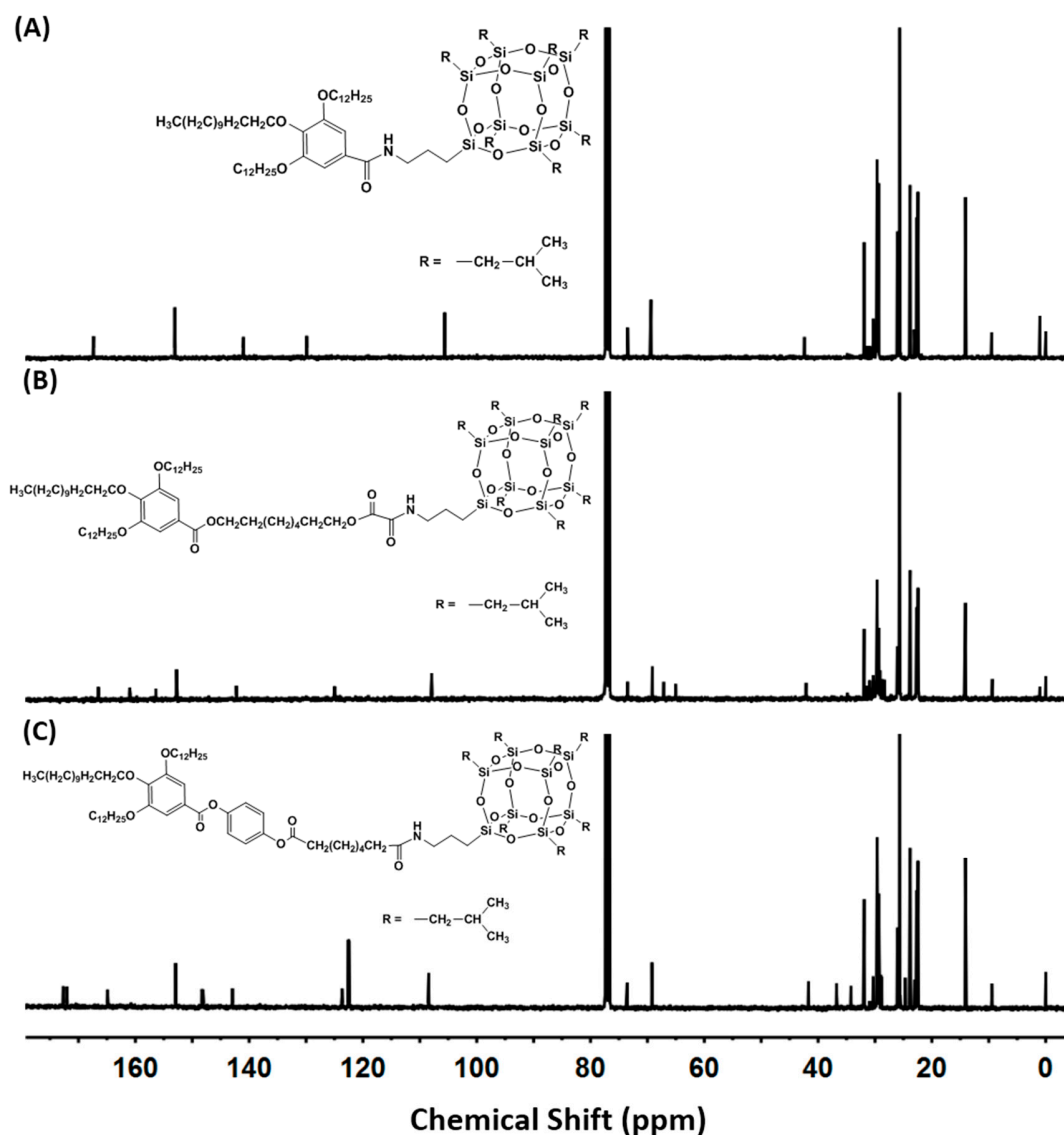

**Figure S1.**  $^{13}\text{C}$ -NMR spectrum of BPOSS-GAD-1 (A), BPOSS-GAD-2 (B) and BPOSS-GAD-3 (C).

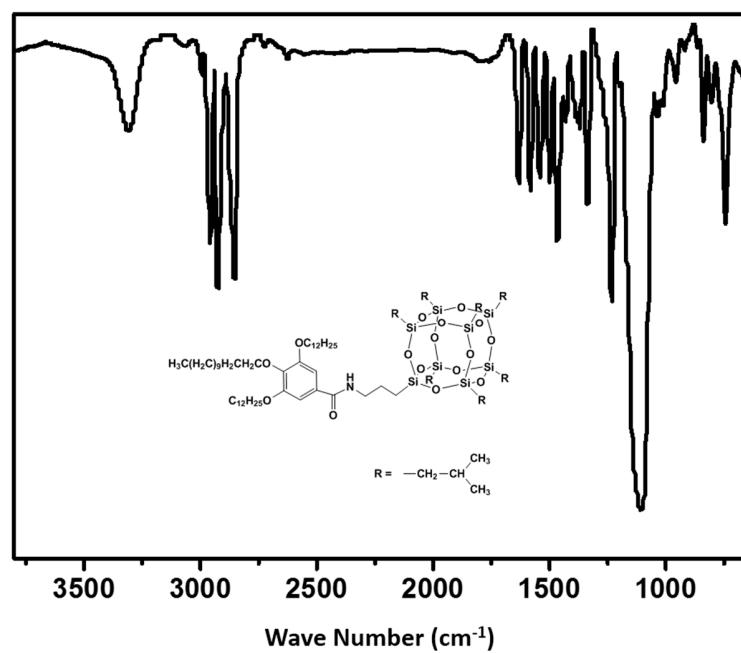

**Figure S2.** FT-IR spectrum of BPOSS-GAD-1

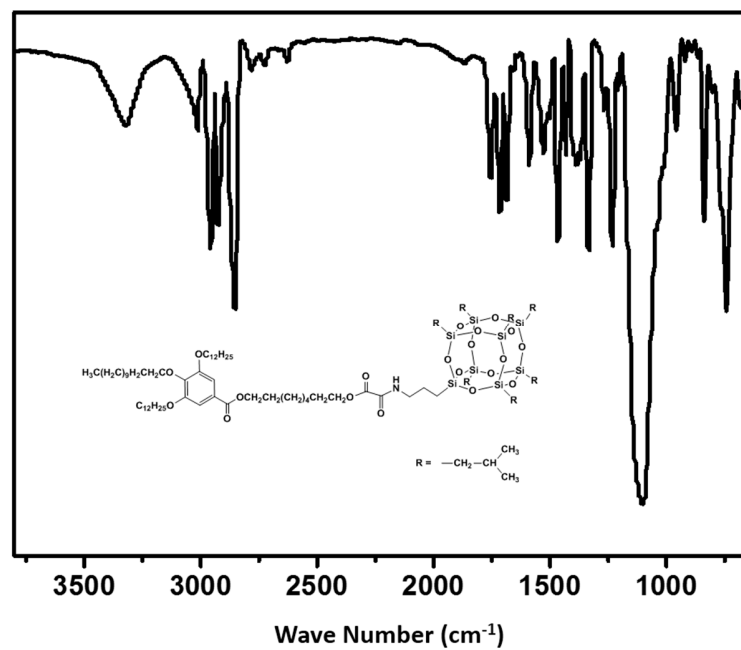

**Figure S3.** FT-IR spectrum of BPOSS-GAD-2

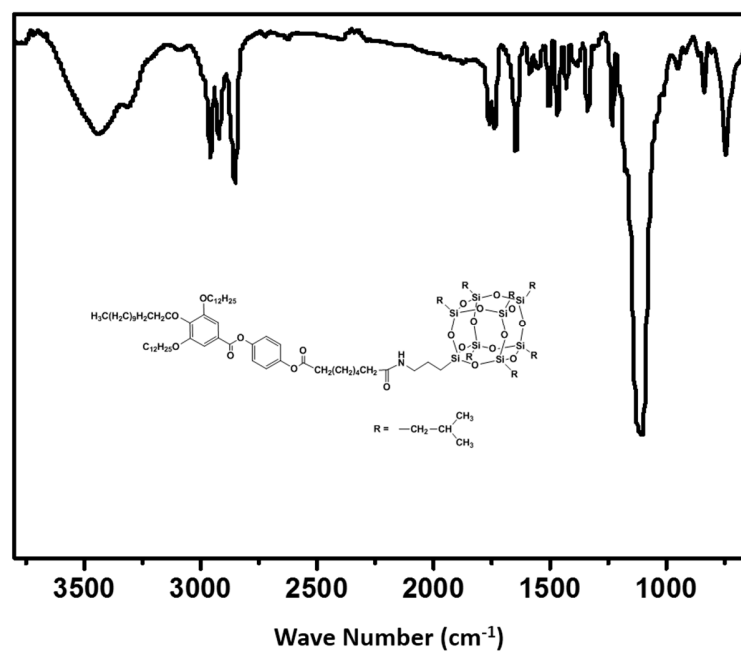

**Figure S4.** FT-IR spectrum of BPOSS-GAD-3

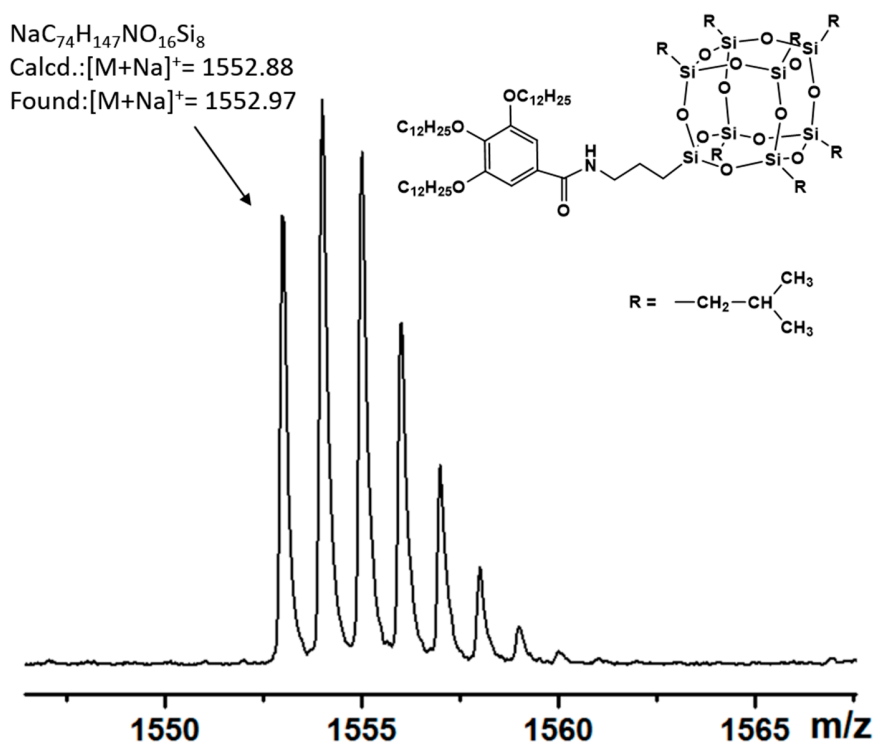

**Figure S5.** MALDI-TOF MS spectrum of BPOSS-GAD-1

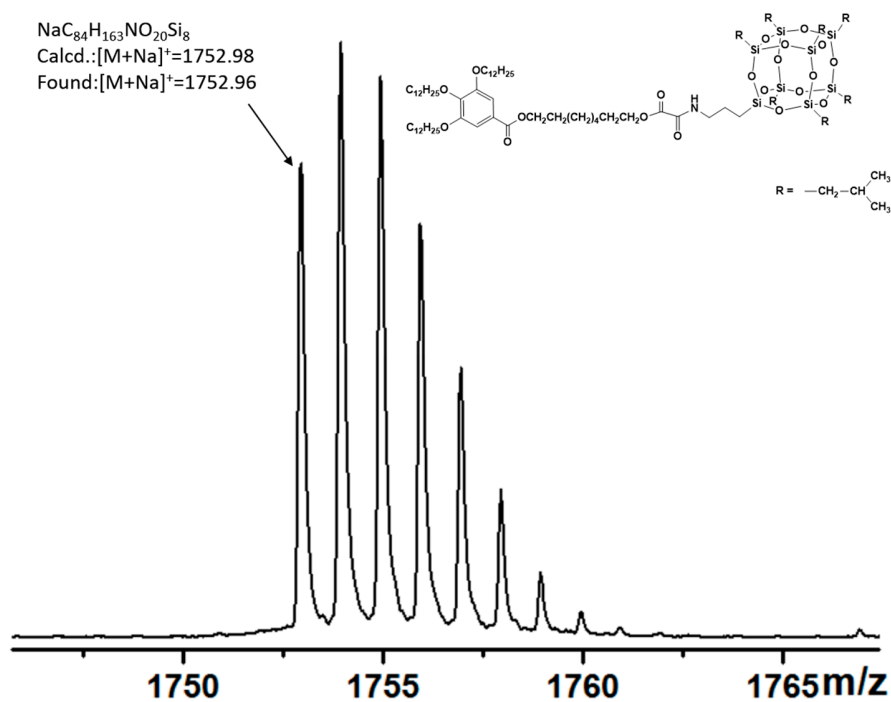

**Figure S6.** MALDI-TOF MS spectrum of BPOSS-GAD-2

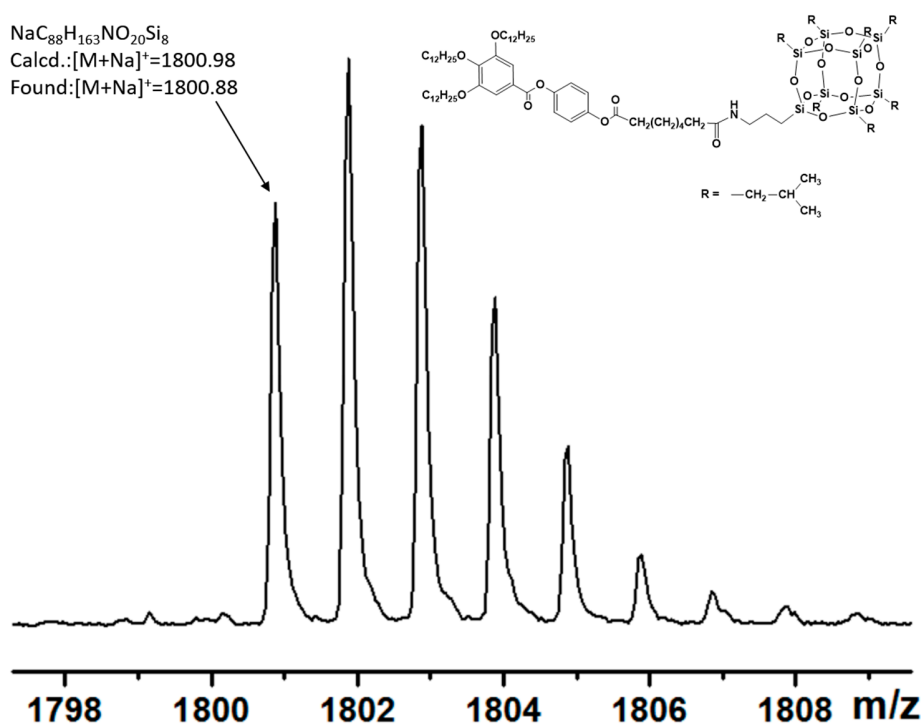

**Figure S7.** MALDI-TOF MS spectrum of BPOSS-GAD-3

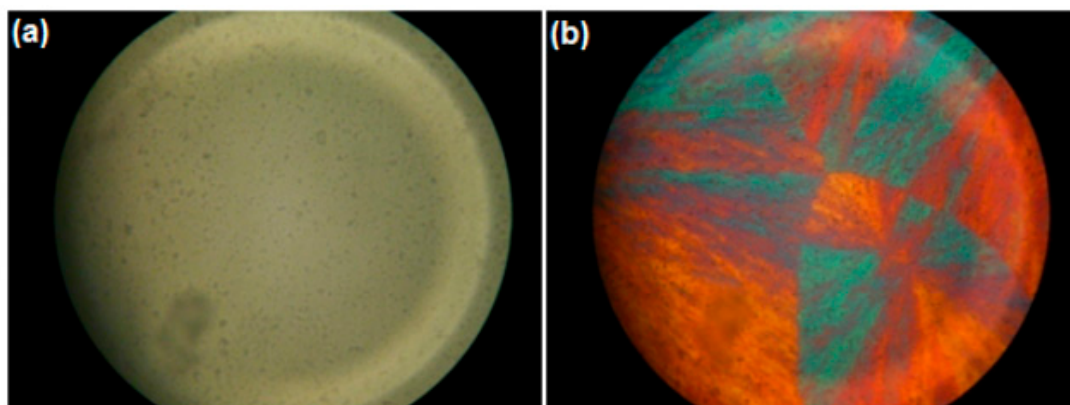

**Figure S8.** PLM pictures of BPOSS-GAD-1, (a) 180 °C and (b) 30 °C.

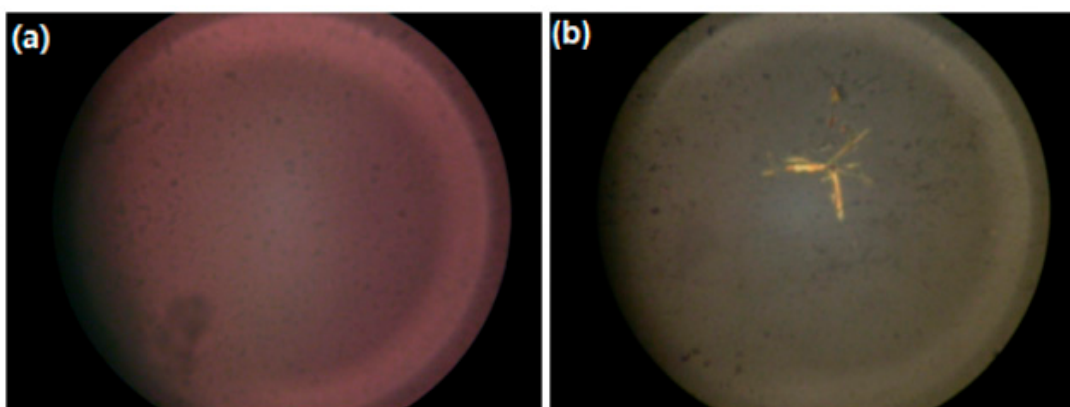

**Figure S9.** PLM pictures of BPOSS-GAD-2, (a) 180 °C and (b) 30 °C.

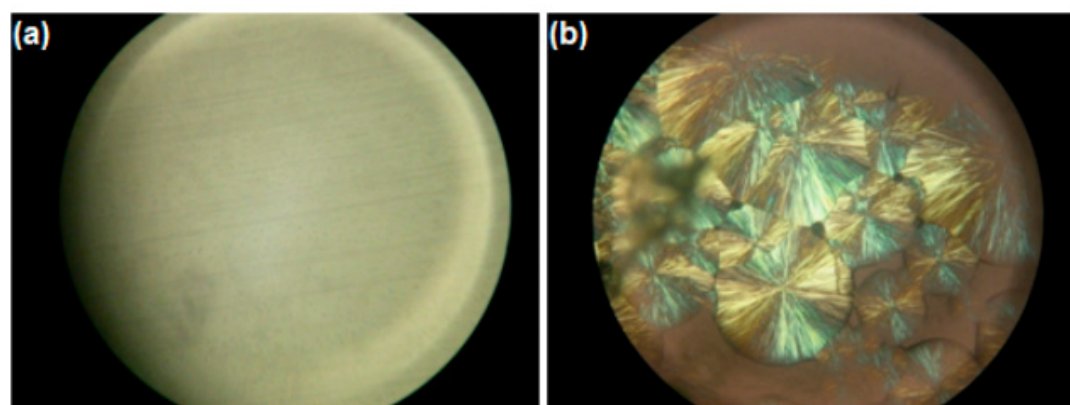

**Figure S10.** PLM pictures of BPOSS-GAD-3, (a) 180 °C and (b) 30 °C.
